# Supplementary material for: Ethinyl estradiol cocrystals assembled by chain structures: improvement in stability and solubility
Source: Royal Society of Chemistry journal article supplement (doi:10.1039/c9nj04147h), 2019-01-01
Supplement: c9nj04147h1.pdf [file c9nj04147h1.pdf]

Electronic Supplementary Information (ESI) for New Journal of Chemistry

## **Ethinyl estradiol cocrystals assembled by chains structures: improvement in stability and solubility**

Rongkai Du,<sup>a</sup> Juan Xu,<sup>b</sup> Lei Zhang,<sup>a</sup> Lifeng Ning,<sup>\*b</sup> Shan Li<sup>\*a</sup>

<sup>a</sup> School of Biology and Biological Engineering, South China University of Technology, Guangzhou 510006, PR China

<sup>b</sup> National Research Institute for Family Planning, Beijing 100081, PR China

\* Corresponding authors.

*E-mail address:* 8205956@qq.com (L. F. Ning)

lishan@scut.edu.cn (S. Li)

### Table of content:

|           |                                                                                               |
|-----------|-----------------------------------------------------------------------------------------------|
| Figure S1 | Experimental and simulated PXRD patterns of EE and cocrystals.                                |
| Figure S2 | <sup>1</sup> H NMR spectra of EE and cocrystals.                                              |
| Figure S3 | FTIR spectra of EE and cocrystals.                                                            |
| Figure S4 | The “hub” in the EE-NA cocrystal.                                                             |
| Figure S5 | The stability and dissolution performance of EE-TET·H <sub>2</sub> O.                         |
| Figure S6 | The comparison of high humidity stability samples of EE and EE hemihydrate simulation by PXRD |
| Figure S7 | Impurity analysis of stability experiments for all cocrystals.                                |

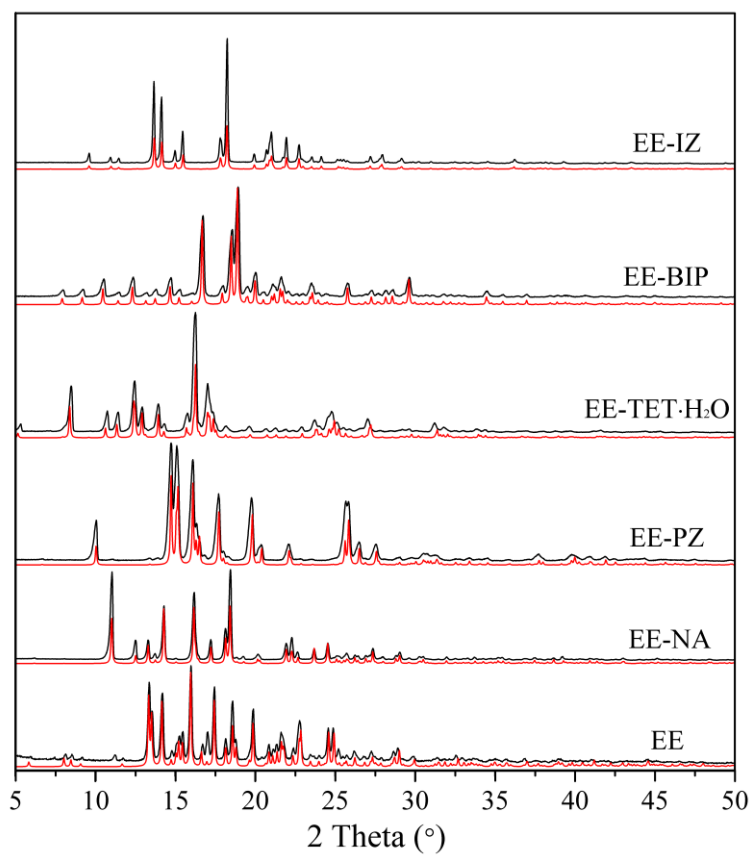

Fig. S1 Overlay of experimental (black) and the simulated (red) PXRD patterns generated from the single crystal diffraction data.

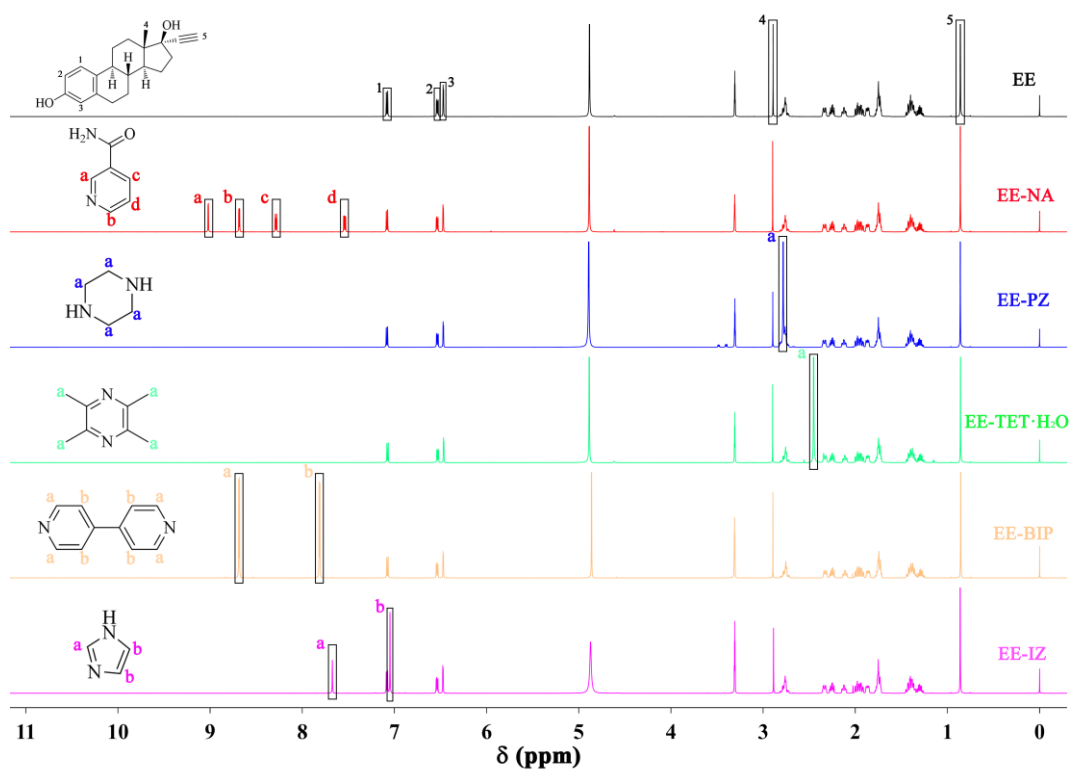

Fig. S2 <sup>1</sup>H NMR spectra of EE and its cocrystals.

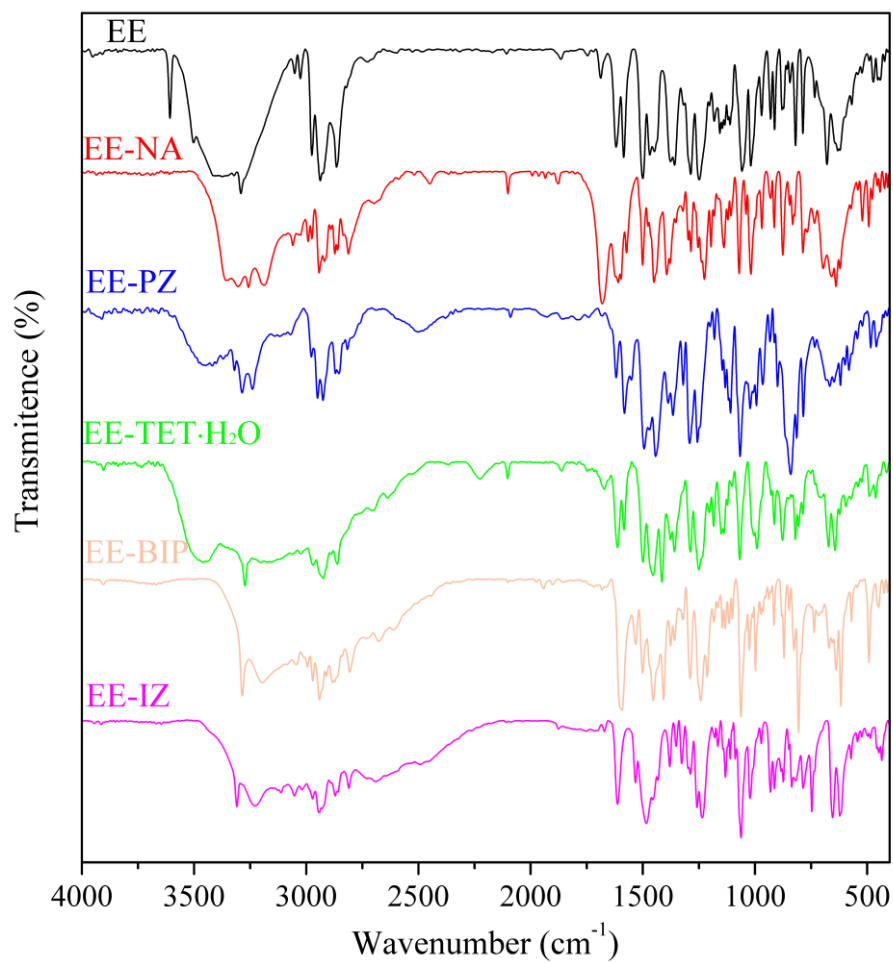

Fig. S3 FTIR spectra of EE and its cocrystals.

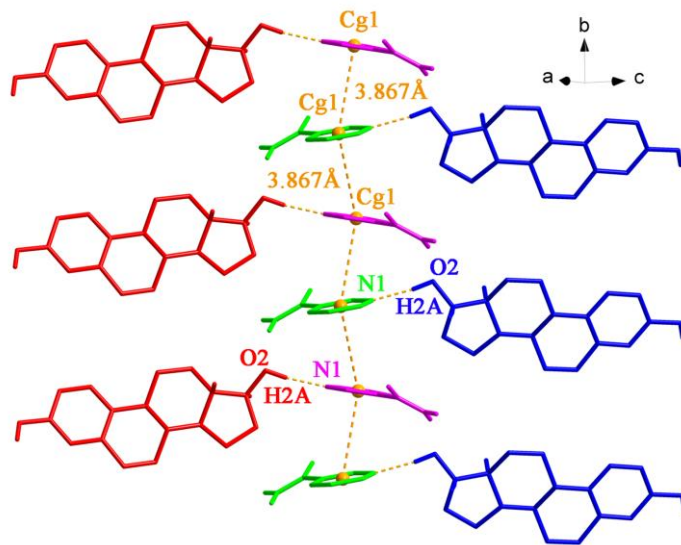

Fig. S4 The "hub" observed in the EE-NA crystal.

The dehydrated product of EE-TET·H<sub>2</sub>O is a new anhydrous cocrystal, because its unique PXRD pattern is different from that of EE-TET·H<sub>2</sub>O. The dissolution performance of EE-TET is similar to EE-TET·H<sub>2</sub>O. The results of stability and hygroscopicity experiments suggest EE-TET can turn into EE-TET·H<sub>2</sub>O in humidity environment.

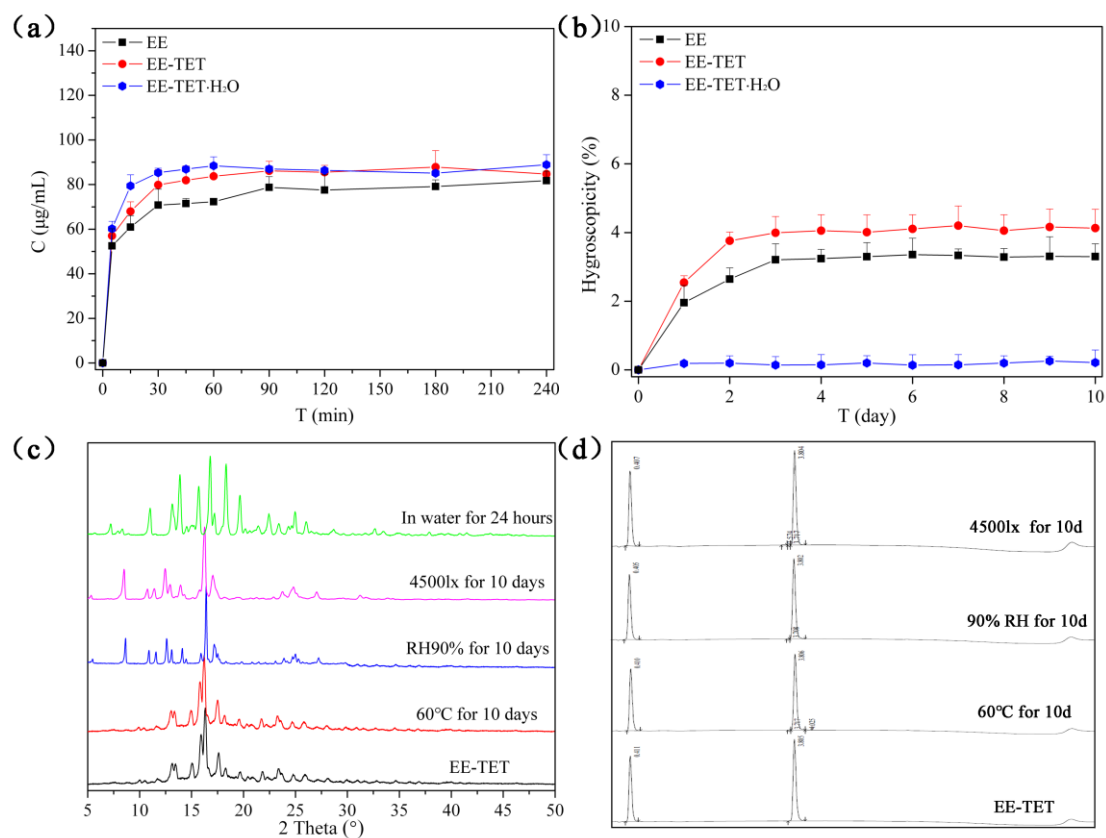

Fig. S5 The stability and dissolution performance of EE-TET·H<sub>2</sub>O. (a) dissolution performance, (b) hygroscopicity, (c) stability and (d) the impurity analysis of stability experiments of EE-TET.

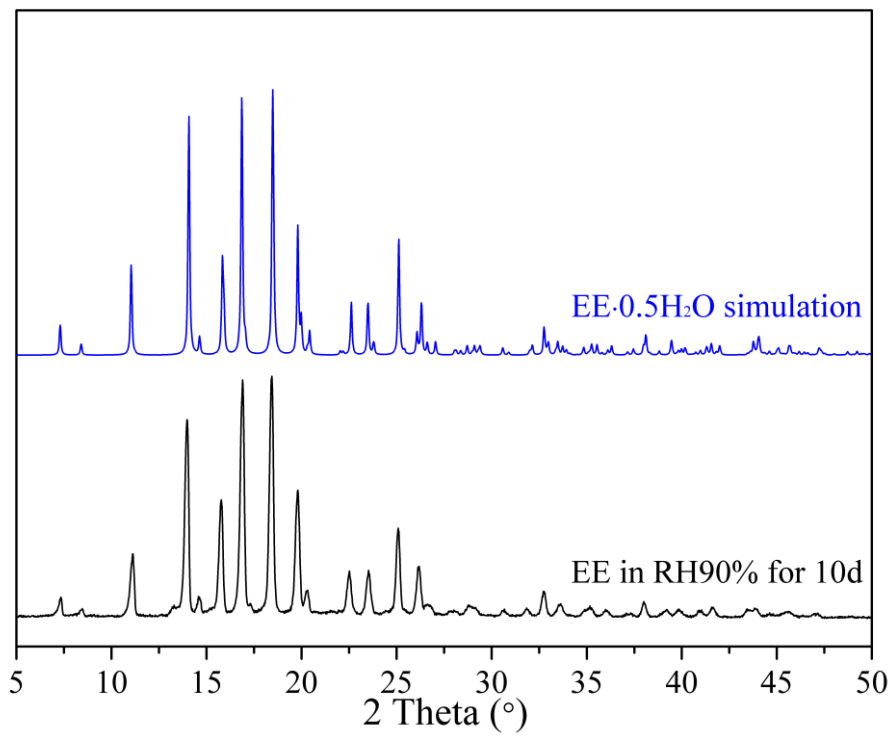

Fig. S6 The comparison of high humidity stability samples of EE and EE hemihydrate simulation by PXRD<sup>1</sup>.

|                  |                                                                                           |
|------------------|-------------------------------------------------------------------------------------------|
| Injection Volume | 0.3 $\mu$ L                                                                               |
| Column           | XBRIDGE 3.5 $\mu$ m 2.1*50mm                                                              |
| Mobile phase     | H <sub>2</sub> O(0.05%TFA)-ACN(0.05%TFA), ACN from 10% to 100% over 7 minutes hold 1 min. |
| Oven temperature | 60 °C                                                                                     |
| Flow rate        | 0.8 mL/min                                                                                |
| Instrument       | SHIMADZU LC-2010A                                                                         |
| Detector         | 214 nm                                                                                    |

**A: Original sample**  
**B: 60°C for 10 days**  
**C: 90% RH for 10 days**  
**D: 4500 lx for 10 days**

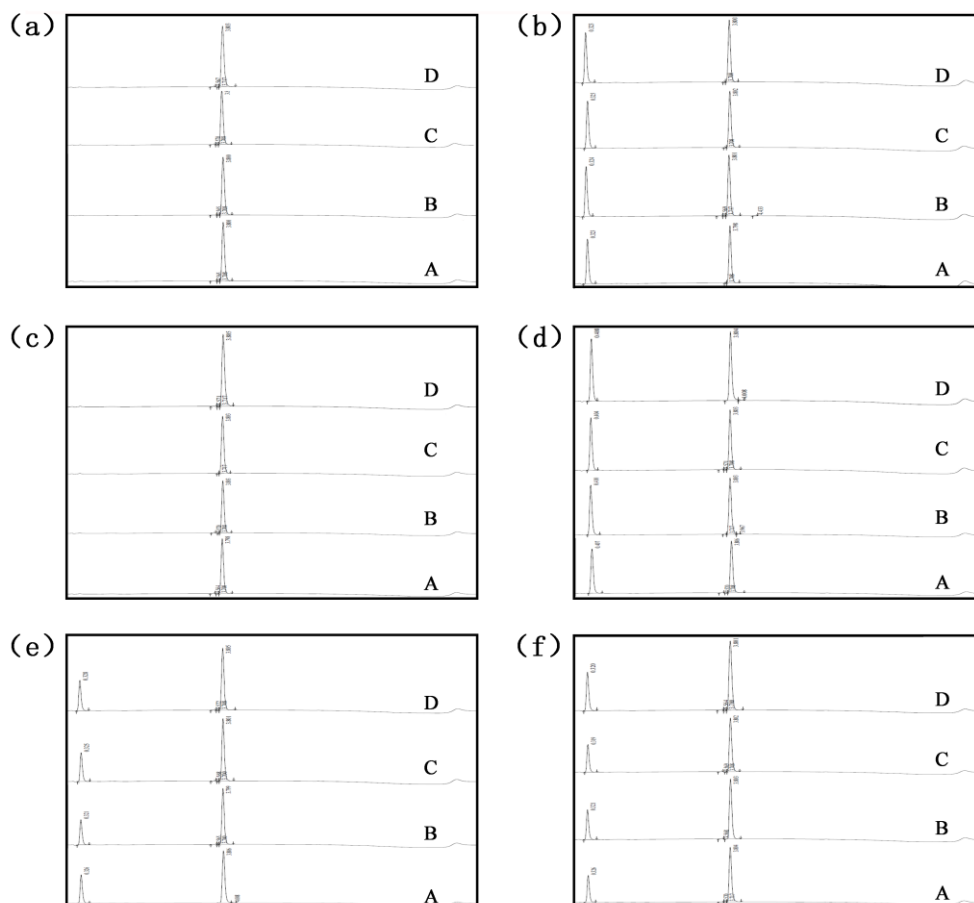

Fig. S7 Impurity analysis of stability experiments for all cocrystals. (a) EE, (b) EE-NA, (c) EE-PZ, (d) EE-TET·H<sub>2</sub>O, (e) EE-BIP and (f) EE-IZ.

## References:

1. C. Guguta, I. Eeuwijk, J. M. M. Smits and R. de Gelder, *Cryst. Growth Des.*, 2008, **8**, 823-831
